# Supplementary figures and images for: Hardware and Software Implementation of the Embedded Controlling System for the TuMag Camera
Source: MDPI journal article supplement (doi:10.3390/electronics12194071), 2023-09-28

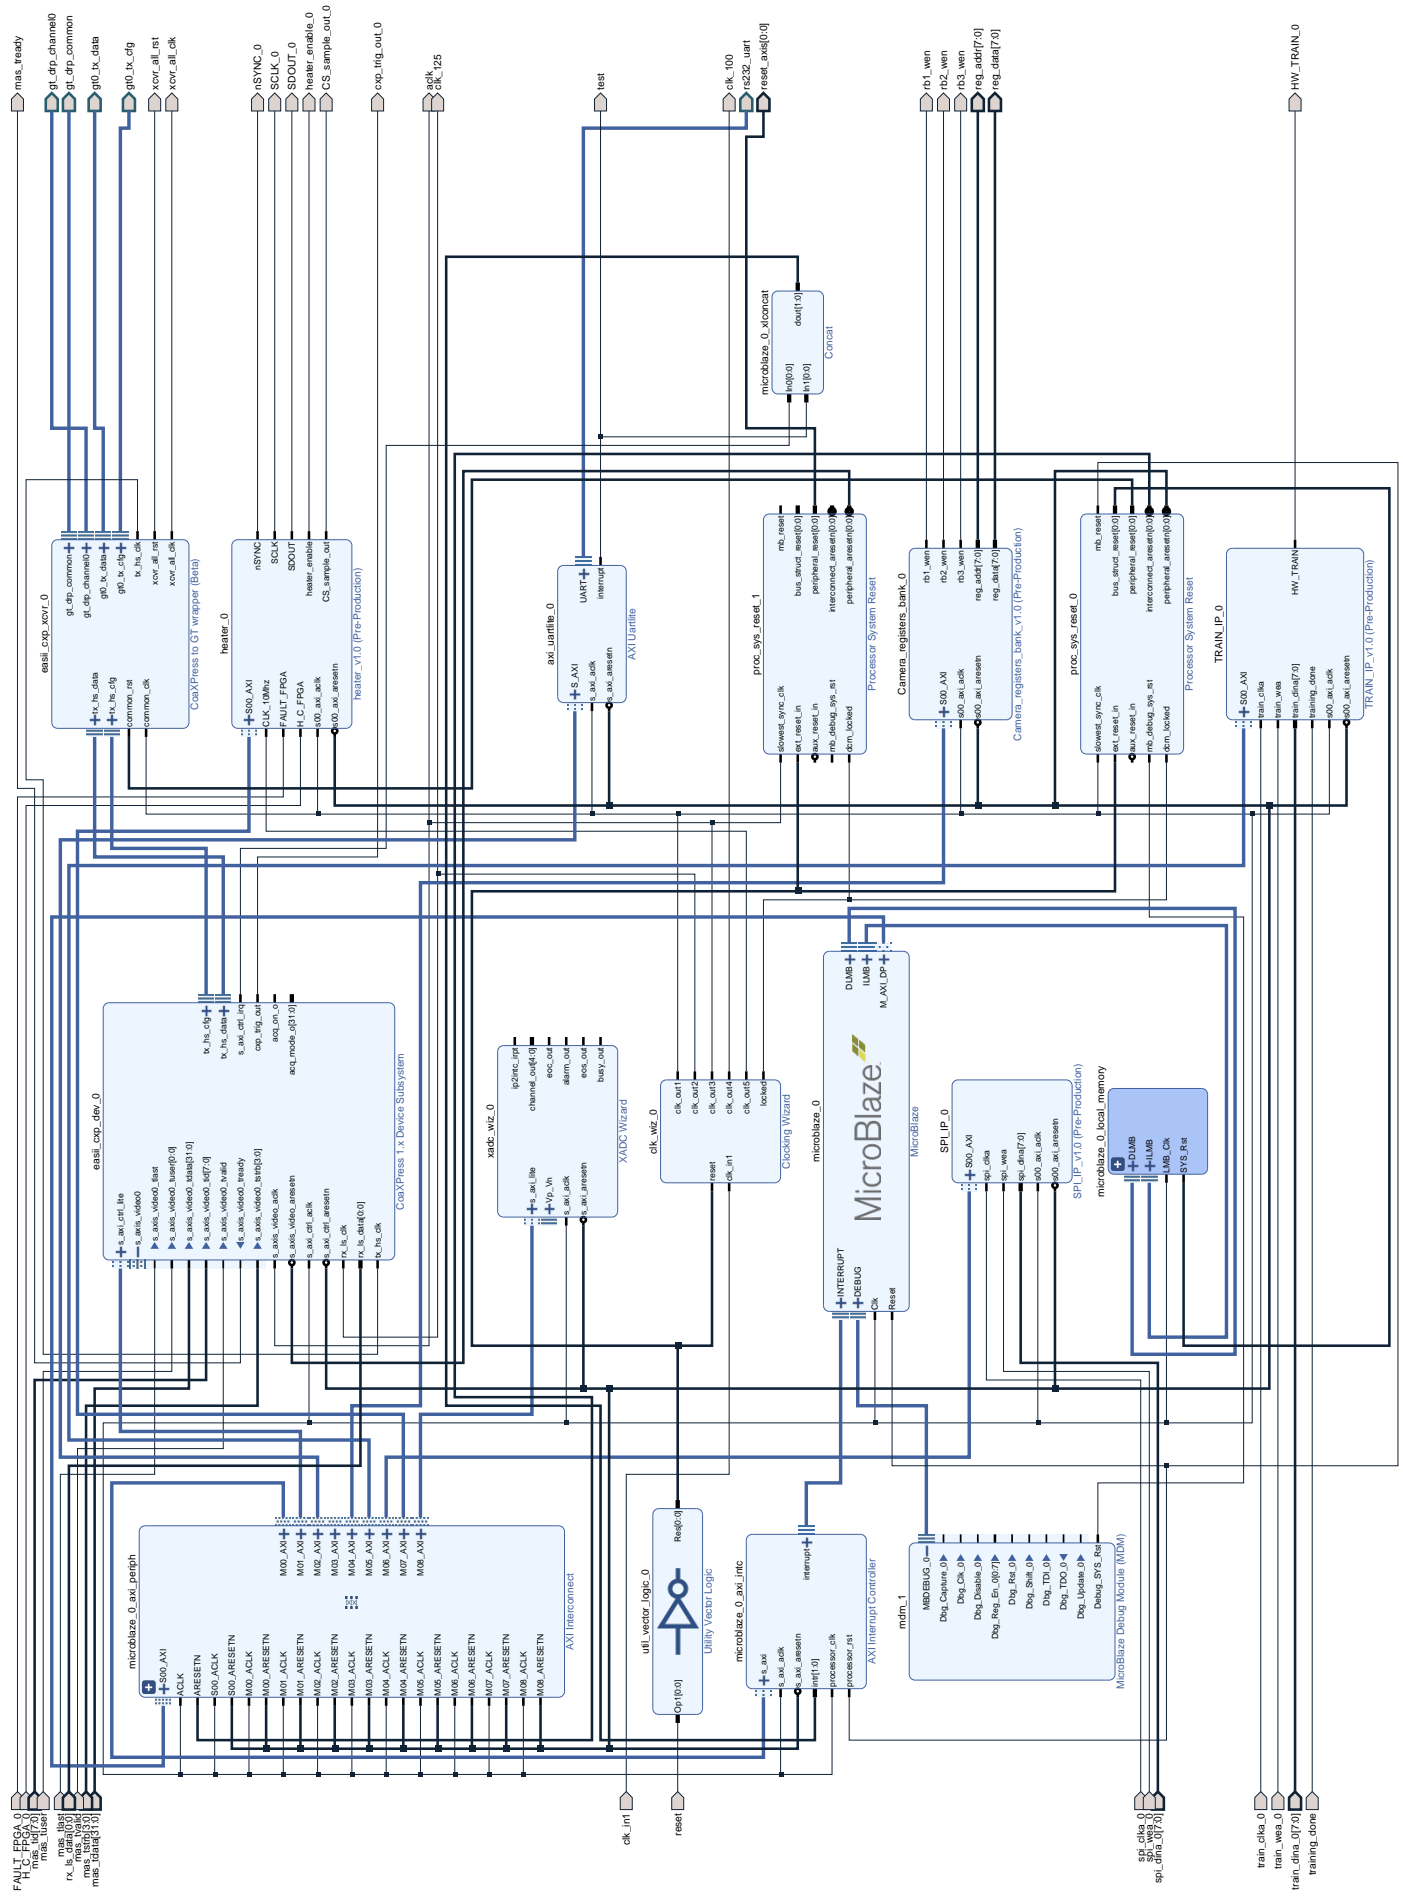

Supplement: s1 [file s1]
